# Supplementary figures and images for: Effect of particle size distribution on rheological properties of chocolate
Source: Royal Society of Chemistry journal article supplement (doi:10.1039/d0fo01655a), 2020-01-01

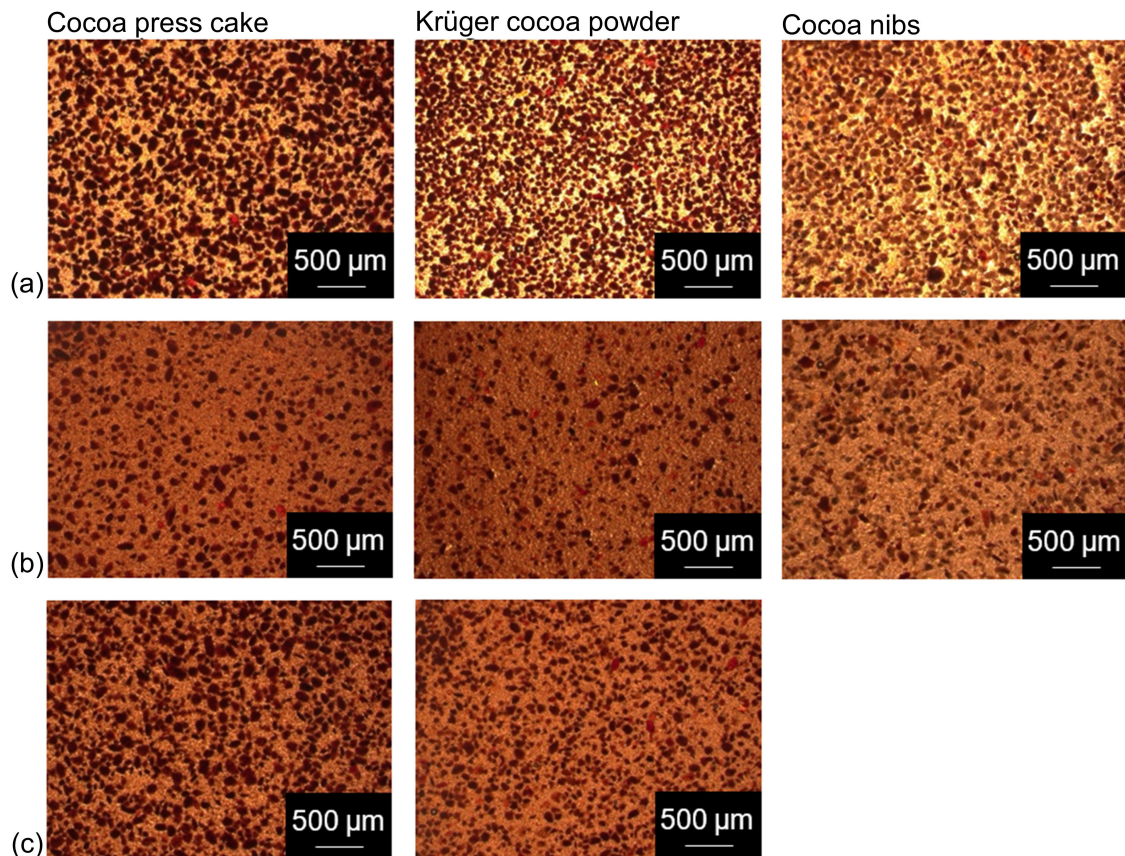

Supplement: d0fo01655a2.pdf [file d0fo01655a2.pdf]
